# Supplementary material for: Focus on the Dynamics of Neutrophil-to-Lymphocyte Ratio in Cancer Patients Treated with Immune Checkpoint Inhibitors: A Meta-Analysis and Systematic Review
Source: MDPI journal article supplement (doi:10.3390/cancers14215297), 2022-10-27
Supplement: s1 [file s1]

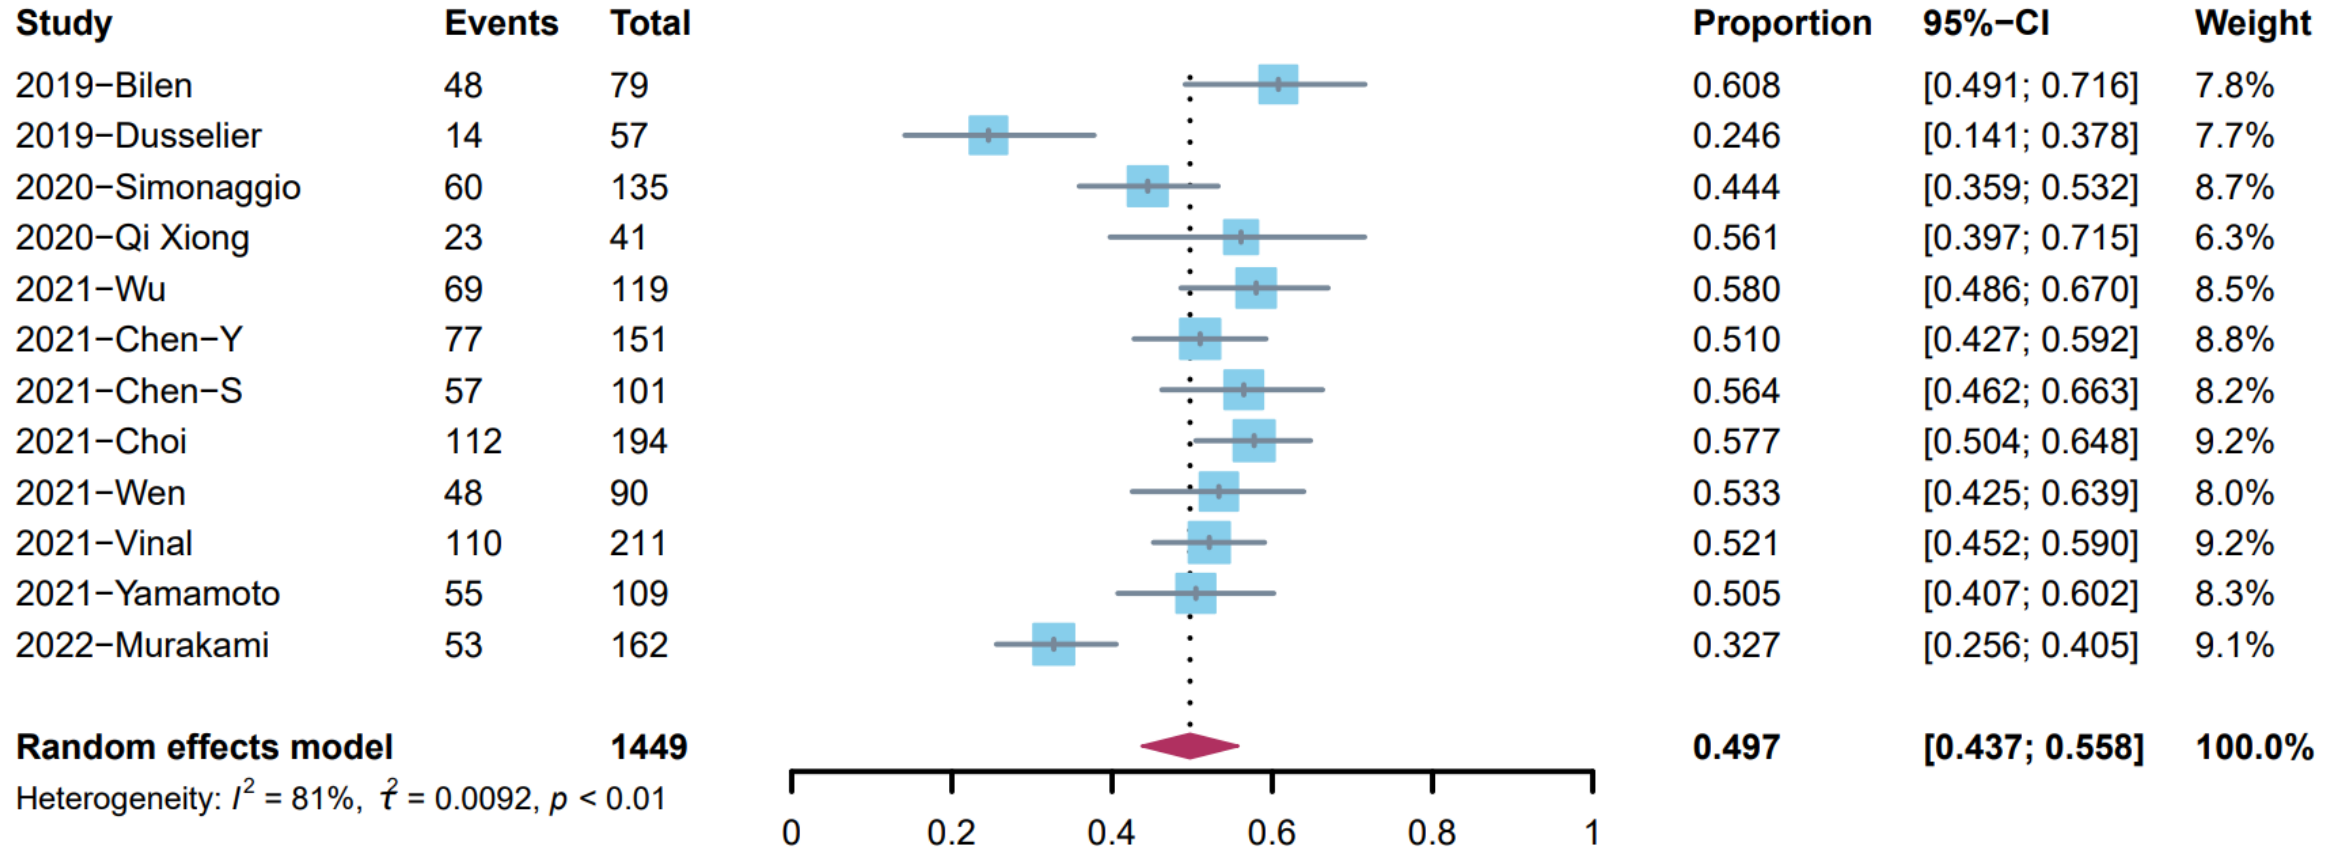

**Figure S1.** The pooled proportion of patients with increased NLR after immunotherapy.

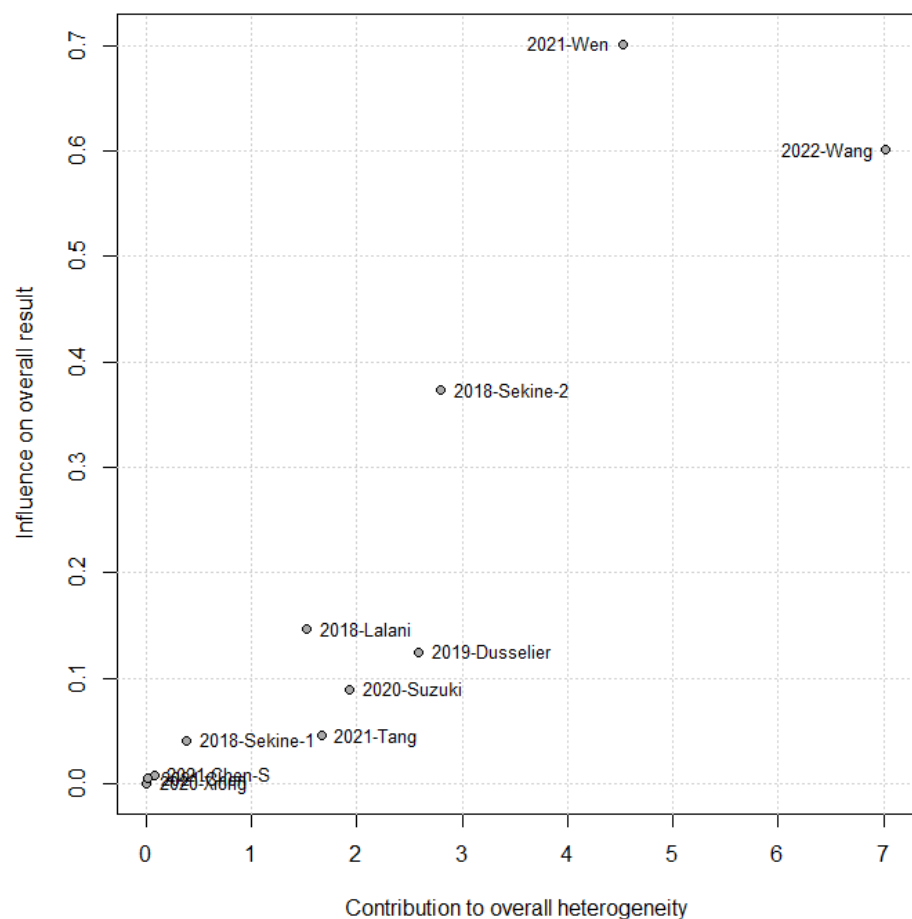

**Figure S2.** Baujat plot for studies reporting the association between the trends in NLR after ICI treatment and ORR.

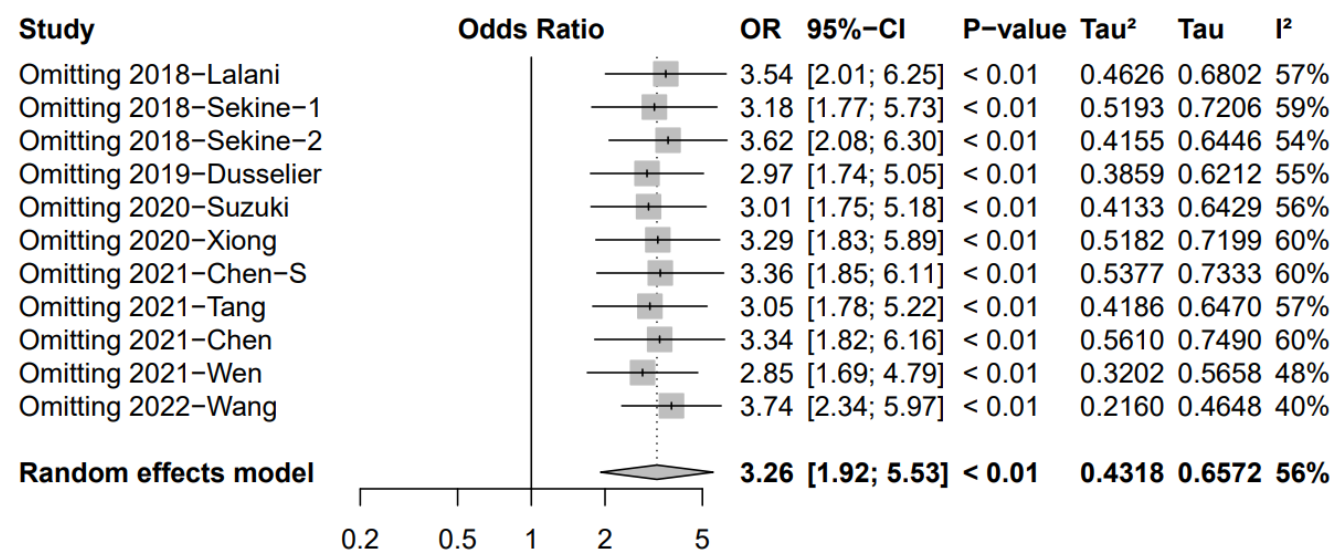

**Figure S3.** Sensitivity analysis for studies reporting the association between the trends in NLR after ICI treatment and ORR.

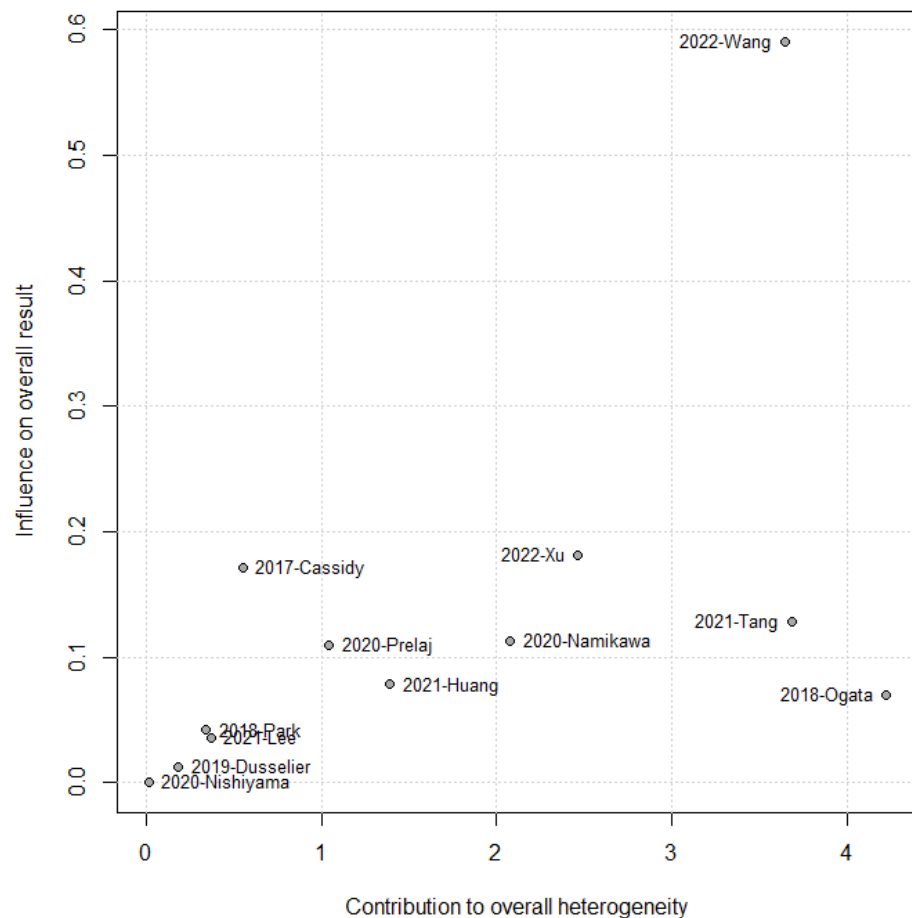

**Figure S4.** Baujat plot for studies reporting the association between OS and NLR at two different time points with the same cut-off values of NLR.

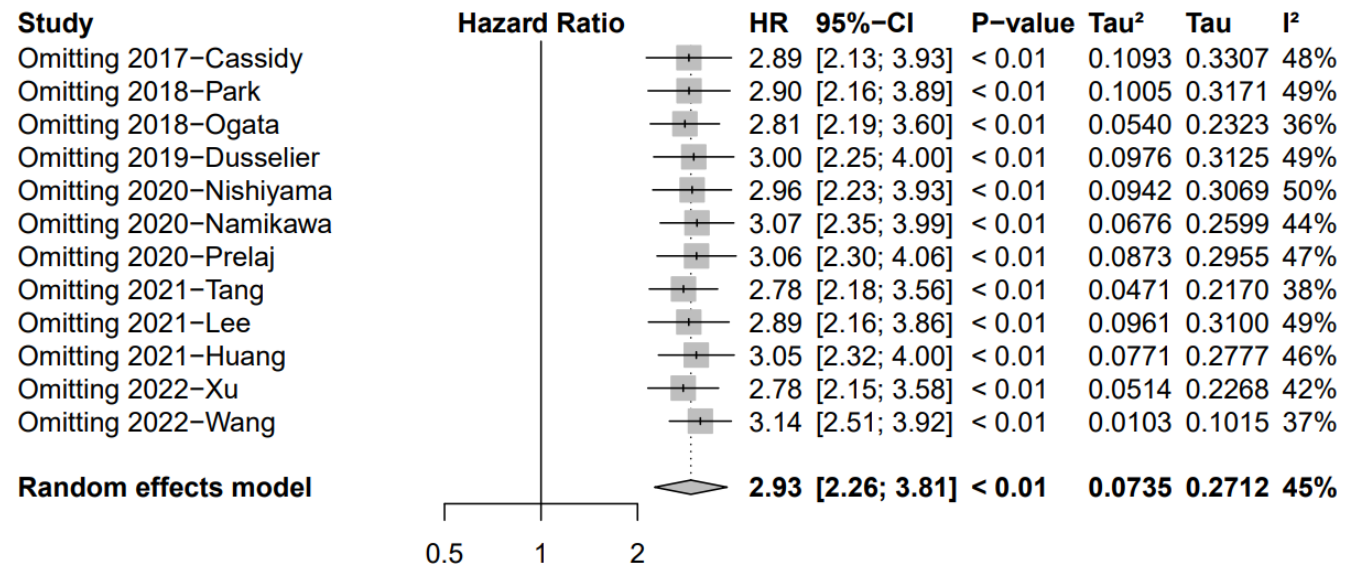

**Figure S5.** Sensitivity analysis for studies reporting the association between OS and NLR at two different time points with the same cut-off values of NLR.

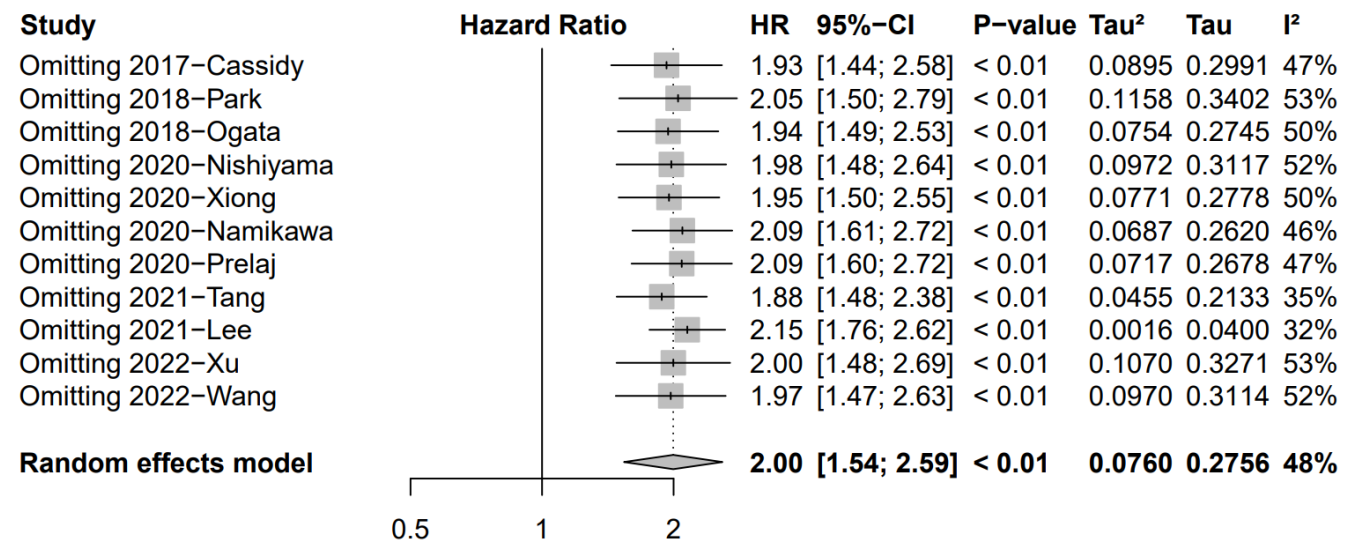

**Figure S6.** Sensitivity analysis for studies reporting the association between PFS and NLR at two different time points with the same cut-off values of NLR.

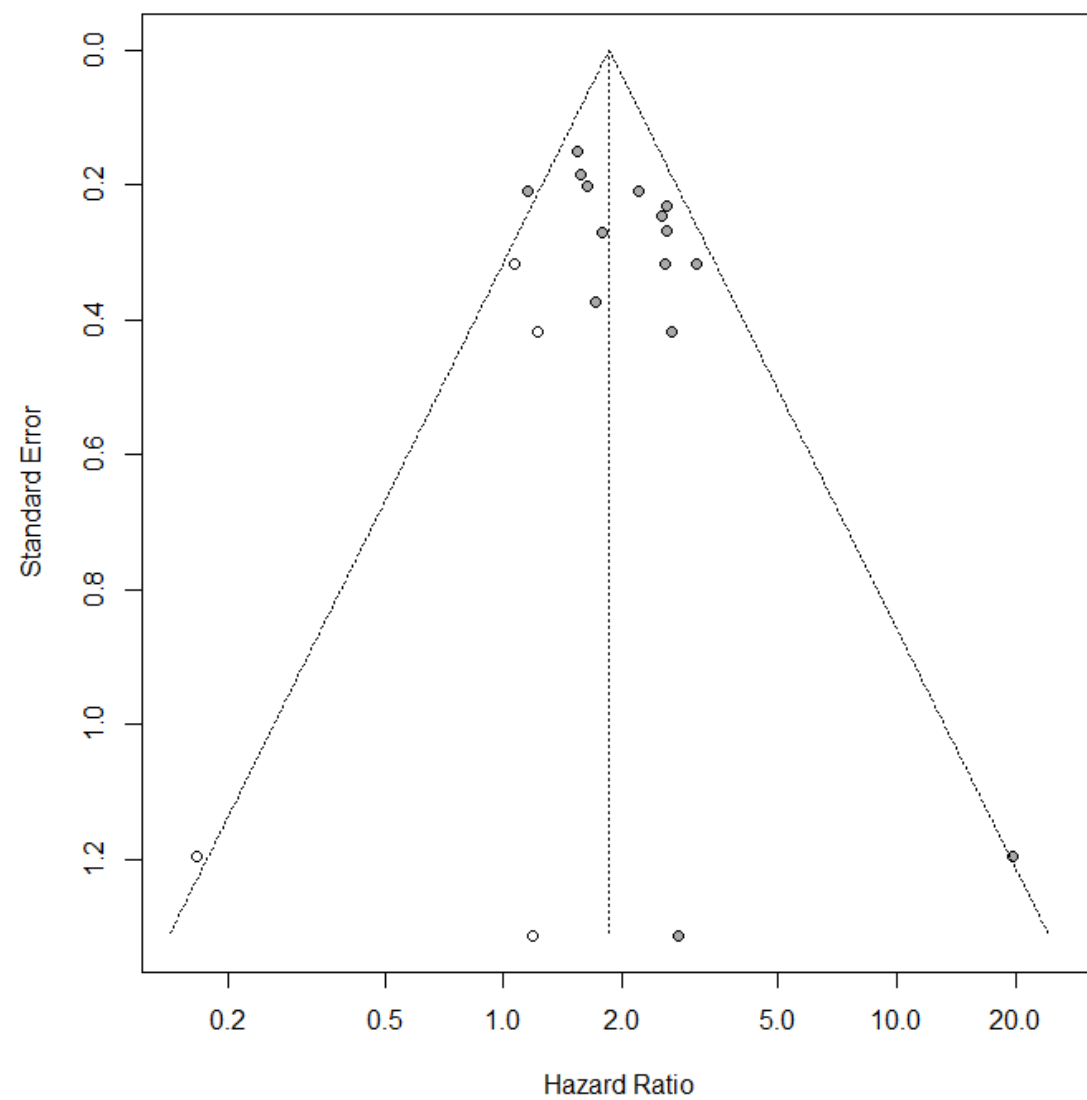

**Figure S7.** Funnel plot plotted after application of the trim-and-fill method.

**Table S1.** Studies reporting the association between the changes in NLR and the response to immunotherapy.

| Reference number | Year | Author            | Treatment                | Tumor                  | The changes of NLR in the patients with response to immunotherapy                                                                                                                                                                                                                                                                                                                                                                                                                                                                                                    | The changes of NLR in the patients without response to immunotherapy                                                                                                                                 |
|------------------|------|-------------------|--------------------------|------------------------|----------------------------------------------------------------------------------------------------------------------------------------------------------------------------------------------------------------------------------------------------------------------------------------------------------------------------------------------------------------------------------------------------------------------------------------------------------------------------------------------------------------------------------------------------------------------|------------------------------------------------------------------------------------------------------------------------------------------------------------------------------------------------------|
| 27               | 2018 | Alona Zer         | Anti-PD-L1               | NSCLC                  | There was a trend toward NLR decrease from baseline to week 8 in patients with response during treatment, and NLR decreased by an average of 1.5 (SD $\pm$ 4.2) in patients with objective response.                                                                                                                                                                                                                                                                                                                                                                 | There was an increasing trend in NLR by week 8 in patients with stable or progressive disease, and NLR increased by an average of 2.4 (SD $\pm$ 6.4) in patients with stable or progressive disease. |
| 37               | 2018 | Malaka Ameratunga | Anti-PD-1 and Anti-PD-L1 | advanced solid tumours | A mixed-effects regression analysis with per-patient random intercept was used to analyse changes in NLR during follow-up. Overall, patients with CR/PR/SD had a lower log transformed NLR ( $p = 0.03$ ) at study entry (Coef = $-0.39$ ; 95% CI = $-0.66$ to $-0.12$ ; $p = 0.005$ and Coef = $-0.39$ ; 95% CI = $-0.61$ to $-0.17$ ; $p < 0.001$ respectively) compared with patients with progressive disease (PD). There was no evidence for an overall change in transformed NLR during follow-up (Coef = $-0.01$ ; 95% CI = $-0.08$ to $0.05$ ; $p = 0.71$ ). |                                                                                                                                                                                                      |
| 42               | 2018 | Monica Khunger    | Nivolumab                | NSCLC                  | NLR Before treatment, mean ( $\pm$ SD): $6.1 \pm 4.4$<br>NLR after two cycles of nivolumab, mean ( $\pm$ SD): $6.6 \pm 11.0$                                                                                                                                                                                                                                                                                                                                                                                                                                         | NLR Before treatment, mean ( $\pm$ SD): $6.5 \pm 3.9$<br>NLR after two cycles of nivolumab, mean ( $\pm$ SD): $13.1 \pm 22.4$                                                                        |
|                  |      |                   |                          |                        | There was no significant difference between two groups in the NLR before treatment ( $6.1$ vs $6.5$ , $P = 0.66$ ), but the NLR after two cycles of nivolumab in the CR or PR group was significantly lower than that in the SD or PD group ( $6.6$ vs. $13.1$ , $P = 0.09$ ).                                                                                                                                                                                                                                                                                       |                                                                                                                                                                                                      |

|    |      |                  |              |                |                                                                                                                                                                                                                                                                          |                                                                                                                                                                                                                                                                                      |
|----|------|------------------|--------------|----------------|--------------------------------------------------------------------------------------------------------------------------------------------------------------------------------------------------------------------------------------------------------------------------|--------------------------------------------------------------------------------------------------------------------------------------------------------------------------------------------------------------------------------------------------------------------------------------|
| 53 | 2020 | Tsutomu Namikawa | Nivolumab    | Gastric cancer | NLR Before treatment, median (range): 2.09 (1.59–5.61)<br>NLR 4 weeks after treatment, median (range): 2.19 (2.04–2.62)                                                                                                                                                  | NLR Before treatment, median (range): 1.83 (0.47–9.42)<br>NLR 4 weeks After treatment, median (range): 2.88 (0.94–12.75)                                                                                                                                                             |
|    |      |                  |              |                | There was no significant difference between two groups in the NLR before treatment (2.09 vs 1.83, P=0.59), but the NLR 4 weeks after the treatment in the CR or PR group was significantly lower than that in the SD or PD group (2.19 vs. 2.88, P = 0.044).             |                                                                                                                                                                                                                                                                                      |
| 32 | 2020 | Daiki Ikarashi   | Nivolumab    | mRCC           | In the patients with PD, the percent change of NLR at week 6 was significantly higher than patients with SD (P=0.0047) and CR/PR (P=0.0019)                                                                                                                              |                                                                                                                                                                                                                                                                                      |
| 45 | 2022 | Lin Wang         | Camrelizumab | ESCC           | NLR Before treatment, median (IQR): 3.14 (2.50–3.74)<br>NLR 8 weeks after treatment, median (IQR): 2.74 (1.98–4.63)<br>In the 16 patients with CR/PR, the NLR level was similar before and after camrelizumab treatment at the first evaluation (3.14 vs 2.74, P=0.718). | NLR Before treatment, median (IQR): 4.27 (2.63–6.57)<br>NLR 8 weeks after treatment, median (IQR): 4.64 (2.92–6.34)<br>In the 32 patients with PD, the median NLR significantly increased from 4.3 (IQR 2.6–6.6) at baseline to 4.6 (IQR 2.9–6.3) (P=0.039) at the first evaluation. |

Note. NSCLC: non-small cell lung cancer; ESCC: esophageal squamous cell carcinoma; mRCC: metastatic renal cell carcinoma; NLR: neutrophil-to-lymphocyte; OS: overall survival; PFS: progression-free survival; PD-1: programmed death-1; PD-L1: programmed death ligand-1; IQR: interquartile range; CR: complete response; PR: partial response; SD: stable disease; PD: progressive disease.

**Table S2.** Studies reporting the association between trends in NLR and prognosis.

| Reference number | Year | Author              | Treatment              | Tumor                                                                                  | Time point                                       | Trend and degree              | Outcome         |
|------------------|------|---------------------|------------------------|----------------------------------------------------------------------------------------|--------------------------------------------------|-------------------------------|-----------------|
| 21               | 2018 | Aly-Khan A Lalani   | Anti-PD1 and anti-PDL1 | mRCC                                                                                   | Baseline and 6 weeks                             | increase>25%;<br>decrease>25% | OS, PFS and ORR |
| 29               | 2018 | Wungki Park         | Nivolumab              | NSCLC                                                                                  | Baseline and before the second dose of nivolumab | increase; decrease            | OS and PFS      |
| 22               | 2018 | Katsutoshi Sekine   | Nivolumab              | NSCLC                                                                                  | Baseline and 4 weeks                             | decrease>10%                  | OS, PFS and ORR |
| 44               | 2019 | Mehmet A Bilen      | /                      | Melanoma, gastrointestinal cancer, Lung/head and neck cancer, Breast cancer and other. | Baseline and 6 weeks                             | increase; decrease            | OS and PFS      |
| 39               | 2019 | Matthieu Dusselier  | Nivolumab              | NSCLC                                                                                  | Baseline and the fourth nivolumab infusions      | increase; decrease            | ORR             |
| 34               | 2019 | Francesco Passiglia | Nivolumab              | NSCLC                                                                                  | Baseline and 6 weeks                             | increase>10%                  | OS              |
| 54               | 2019 | A Simonaggio        | Nivolumab              | mNSCLC and mRCC                                                                        | Baseline and 6 weeks                             | increase; decrease            | OS and PFS      |
| 28               | 2020 | Kotaro Suzuki       | Nivolumab              | mRCC                                                                                   | Baseline and 4 weeks                             | decrease>25%                  | PFS and ORR     |

|    |      |                |                                                         |                                    |                                          |                            |                 |
|----|------|----------------|---------------------------------------------------------|------------------------------------|------------------------------------------|----------------------------|-----------------|
| 46 | 2020 | Daichi Tamura  | Pembrolizumab                                           | Urothelial carcinoma               | Baseline and 6 weeks                     | increase>6.12%             | PFS             |
| 26 | 2020 | Takuto Shimizu | Pembrolizumab                                           | Metastatic urothelial carcinoma    | Baseline and 4 weeks                     | increase>15%               | OS and PFS      |
| 23 | 2020 | Yumiko Ota     | Nivolumab                                               | Gastric cancer                     | Baseline, 4 weeks (PFS) and 8 weeks (OS) | increase>2 units           | OS and PFS      |
| 47 | 2021 | Shixue Chen    | Nivolumab, pembrolizumab and others                     | NSCLC                              | Baseline and 6 weeks                     | increase; decrease         | OS, PFS and ORR |
| 20 | 2021 | Yuzhong Chen   | Pembrolizumab, Sintilimab and Toripalimab               | NSCLC                              | Baseline and 6 weeks                     | increase; decrease         | PFS and ORR     |
| 18 | 2021 | Jeong Uk Lim   | Nivolumab, pembrolizumab, and atezolizumab              | NSCLC                              | Baseline and 2 weeks                     | increase>1 unit            | PFS             |
| 43 | 2021 | Qi Xiong       | Nivolumab, pembrolizumab, atezolizumab, and toripalimab | SCLC                               | Baseline and 6 weeks                     | increase; decrease         | ORR             |
| 30 | 2021 | Yin Tang       | Anti-PD1 and anti-PDL1                                  | NSCLC                              | Baseline and 6 weeks                     | increase>20%; decrease>20% | OS, PFS and ORR |
| 50 | 2021 | Jwa Hoon Kim   | Nivolumab and pembrolizumab                             | Esophageal Squamous Cell Carcinoma | Baseline and after a treatment cycle     | increase>40%               | OS and PFS      |



|    |      |                 |                                                                                |                                                                                                     |                                       |                    |                 |
|----|------|-----------------|--------------------------------------------------------------------------------|-----------------------------------------------------------------------------------------------------|---------------------------------------|--------------------|-----------------|
| 33 | 2021 | Won-Mook Choi   | Nivolumab                                                                      | HCC                                                                                                 | Baseline and 4 weeks                  | increase; decrease | OS and PFS      |
| 40 | 2021 | Pei Yi Lee      | Nivolumab, pembrolizumab, atezolimumab, avelumab, durvalumab, and tremelimumab | Lung cancer, colorectal cancer, nasopharyngeal carcinoma, gastric cancer, hepatocellular carcinoma. | Baseline and 6 weeks                  | increase; decrease | OS and PFS      |
| 41 | 2021 | Xianbin Wu      | Anti-PD1                                                                       | Esophageal squamous cell carcinoma                                                                  | Baseline and 6 weeks                  | increase           | ORR             |
| 48 | 2021 | D Viñal         | /                                                                              | Lung cancer, melanoma, kidney cancer, bladder cancer, others                                        | Baseline and before a treatment cycle | increase; decrease | OS and PFS      |
| 52 | 2021 | Jin Shang       | Nivolumab, pembrolizumab, atezolimumab, ipilimumab, and sintilimumab.          | Pancreatic cancer                                                                                   | Baseline and after 2 doses            | decrease>10%       | OS and PFS      |
| 51 | 2022 | Yusuke Murakami | Nivolumab                                                                      | NSCLC                                                                                               | Baseline and 4 weeks                  | increase; decrease | OS              |
| 45 | 2022 | Lin Wang        | Camrelizumab                                                                   | Esophageal squamous cell carcinoma                                                                  | Baseline and 8 weeks                  | decrease>20%       | OS, PFS and ORR |

|    |      |                 |                                                                 |                                 |                      |                    |            |
|----|------|-----------------|-----------------------------------------------------------------|---------------------------------|----------------------|--------------------|------------|
| 8  | 2022 | Deniz Can Guven | Nivolumab, atezolizumab, pembrolizumab, ipilimumab and avelumab | RCC, melanoma, NSCLC and other. | Baseline and 4 weeks | increase>10%       | OS and PFS |
| 19 | 2022 | Shaodi Wen      | Pembrolizumab, sintilimab, toripalimab                          | NSCLC                           | Baseline and 6 weeks | increase; decrease | ORR        |

Note. NLR: neutrophil-to-lymphocyte ratio; NSCLC: non-small cell lung cancer; SCLC: small cell lung cancer; mNSCLC: metastatic non-small cell lung cancer; RCC: renal cell carcinoma; mRCC: metastatic renal cell carcinoma; HCC: hepatocellular carcinoma; OS: overall survival; PFS: progression-free survival; ORR: objective response rate; PD-1: programmed death-1; PD-L1: programmed death ligand-1

**Table S3.** Studies that gave the values of baseline and post-treatment NLR with the same cut-off values.

| Reference number | Year | Author             | Treatment                                               | Tumor          | Cut-off values | Time point                              | Outcome    |
|------------------|------|--------------------|---------------------------------------------------------|----------------|----------------|-----------------------------------------|------------|
| 35               | 2017 | Michael R Cassidy  | Ipilimumab                                              | Melanoma       | 5              | Baseline and 6 weeks                    | OS and PFS |
| 29               | 2018 | Wungki Park        | Nivolumab                                               | NSCLC          | 5              | Baseline and before the second infusion | OS and PFS |
| 38               | 2018 | Takatsugu Ogata    | Nivolumab                                               | Gastric cancer | 5              | Baseline and after the first infusion   | OS and PFS |
| 39               | 2019 | Matthieu Dusselier | Nivolumab                                               | NSCLC          | 5              | Baseline and after the fourth infusion  | OS         |
| 36               | 2020 | Naotaka Nishiyama  | Nivolumab                                               | mRCC           | 3              | Baseline and 4 weeks                    | OS and PFS |
| 53               | 2020 | Tsutomu Namikawa   | Nivolumab                                               | Gastric cancer | 2.5            | Baseline and 6 weeks                    | OS and PFS |
| 31               | 2020 | Arsela Prelaj      | Nivolumab and pembrolizumab                             | NSCLC          | 4              | Baseline and the third treatment cycle  | OS and PFS |
| 43               | 2021 | Qi Xiong           | Nivolumab, pembrolizumab, atezolizumab, and toripalimab | SCLC           | 5              | Baseline and 6 weeks                    | PFS        |

|    |      |             |                                                                                |                                                                                                     |   |                                         |            |
|----|------|-------------|--------------------------------------------------------------------------------|-----------------------------------------------------------------------------------------------------|---|-----------------------------------------|------------|
| 25 | 2020 | Lan Huang   | Nivolumab, pembrolizumab, atezolizumab and ipilimumab                          | NSCLC                                                                                               | 5 | Baseline and the fourth treatment cycle | OS         |
| 30 | 2021 | Yin Tang    | Anti-PD1 and anti-PDL1                                                         | NSCLC                                                                                               | 5 | Baseline and 6 weeks                    | OS and PFS |
| 40 | 2021 | Pei Yi Lee  | Nivolumab, pembrolizumab, atezolizumab, avelumab, durvalumab, and tremelimumab | Lung cancer, colorectal cancer, nasopharyngeal carcinoma, gastric cancer, hepatocellular carcinoma. | 5 | Baseline and 6 weeks                    | OS and PFS |
| 24 | 2022 | Jianming Xu | Sintilimab                                                                     | Esophageal squamous cell carcinoma                                                                  | 3 | Baseline and 6 weeks                    | OS and PFS |
| 45 | 2022 | Lin Wang    | Camrelizumab                                                                   | Esophageal squamous cell carcinoma                                                                  | 4 | Baseline and 8 weeks                    | OS and PFS |

Note. NLR: neutrophil-to-lymphocyte ratio; NSCLC: non-small cell lung cancer; SCLC: small cell lung cancer; mRCC: metastatic renal cell carcinoma; NLR: neutrophil-to-lymphocyte; OS: overall survival; PFS: progression-free survival; PD-1: programmed death-1; PD-L1: programmed death ligand-1
